# Supplementary material for: A PRPH splice-donor variant associates with reduced sural nerve amplitude and risk of peripheral neuropathy
Source: PubMed Central journal article supplement (PMC6468012; doi:10.1038/s41467-019-09719-4), 2019-04-16
Supplement: 41467_2019_9719_MOESM1_ESM.pdf [file 41467_2019_9719_MOESM1_ESM.pdf]

## Supplementary Information

### **A *PRPH* splice-donor variant associates with reduced sural nerve amplitude and risk of peripheral neuropathy**

Bjornsdottir *et al.*

#### Contents

|                                                                                            |    |
|--------------------------------------------------------------------------------------------|----|
| Supplementary Figure 1. Distribution and average plots .....                               | 2  |
| Supplementary Figure 2. Manhattan plots for sural nerve conduction traits .....            | 6  |
| Supplementary Figure 3. Log(SNAP) (log(uV)), decreases with age (N=6,879) .....            | 7  |
| Supplementary Figure 4. Immunoblot analysis .....                                          | 8  |
| Supplementary Table 1. Pearson correlations for nerve conduction and body measures.....    | 9  |
| Supplementary Table 2. Multiple regression analysis of log transferred SNAP.....           | 11 |
| Supplementary Table 3. Association results for rs73112142-A with common neuropathies ..... | 12 |
| Supplementary Table 4. GWAS catalogue associations with PN tested in SNAP and SNCV .....   | 13 |
| Supplementary Table 5. Summary of neurological exam results for re-called subjects.....    | 14 |
| Supplementary Table 6. Primers used for <i>PRPH</i> plasmids generation .....              | 15 |

## Supplementary Figure 1. Distribution and average plots

Distribution shown for Sural Nerve Amplitude Potential (SNAP) and Sural Nerve Conduction Velocity (SNCV) in a dataset of individuals with nerve conduction, height, Body Mass Index (BMI) and leg fat mass (LFM) measurements. Individuals with missing values for SNAP are excluded in figures for SNAP and individuals with missing values for SNCV are excluded in figures for SNCV.

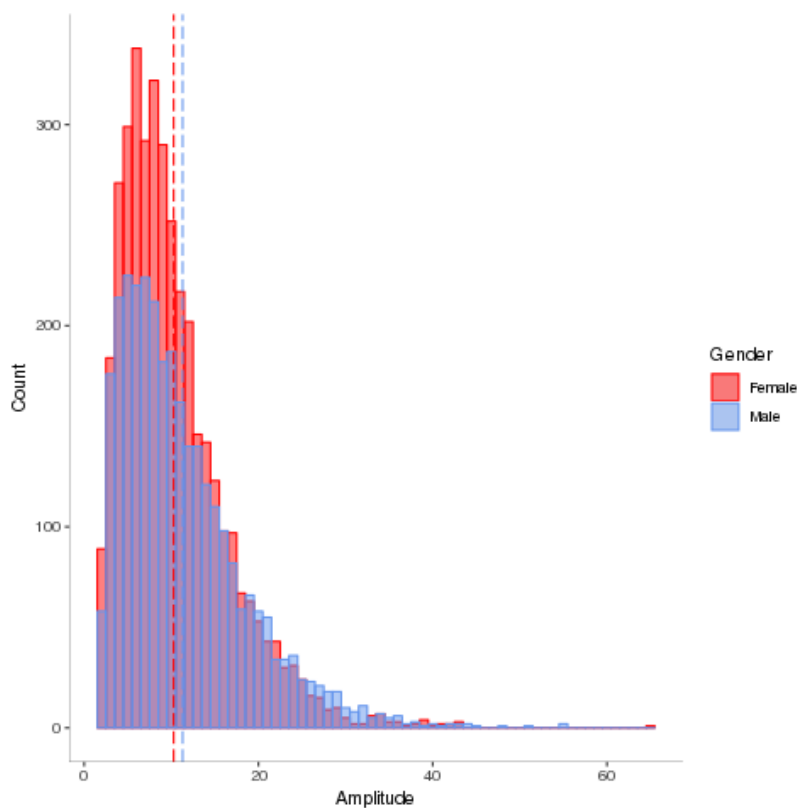

**1a. Sural Nerve Amplitude Potential (SNAP)** for 6,889 individuals with SNAP ( $\mu\text{V}$ ) measurements.

Vertical dotted lines represent SNAP mean for each gender. Values at 4  $\mu\text{V}$  and above are considered normal<sup>1,2</sup>.

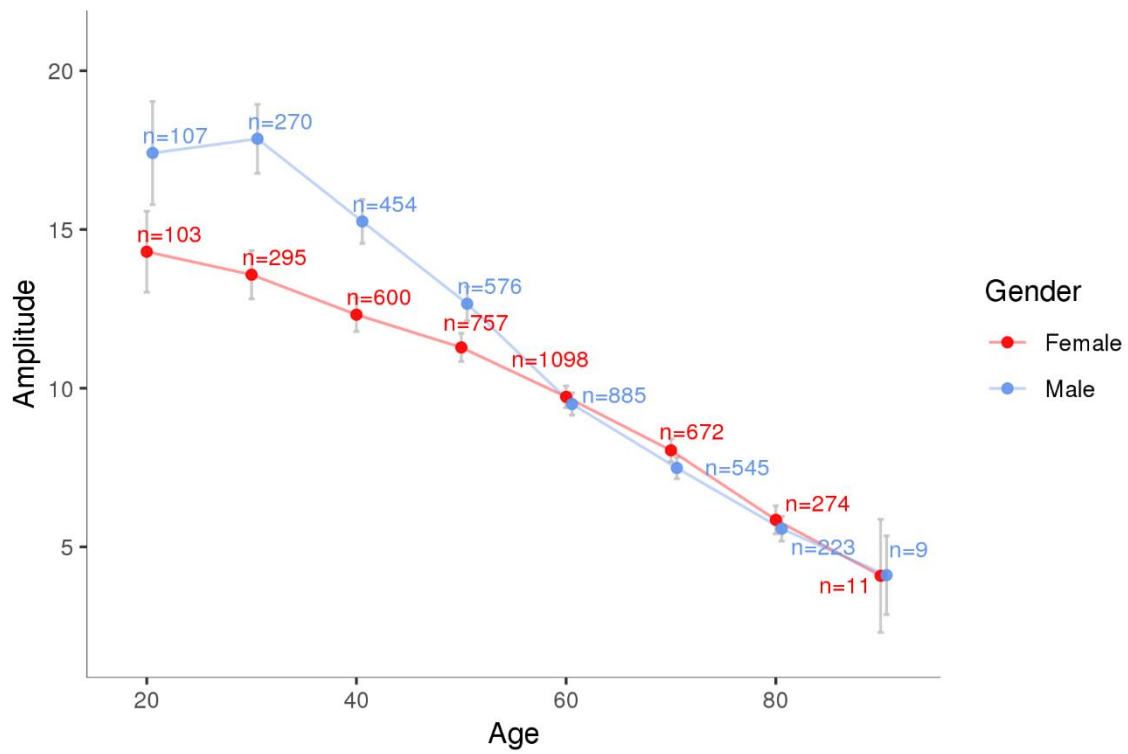

**1b. Mean SNAP (amplitude) measurement per age group**

Grey vertical lines represent 95% confidence intervals. Correlation between age (yrs) and SNAP( $\mu\text{V}$ ) is  $-0.43$  ( $P = 4.7 \times 10^{-318}$ ).

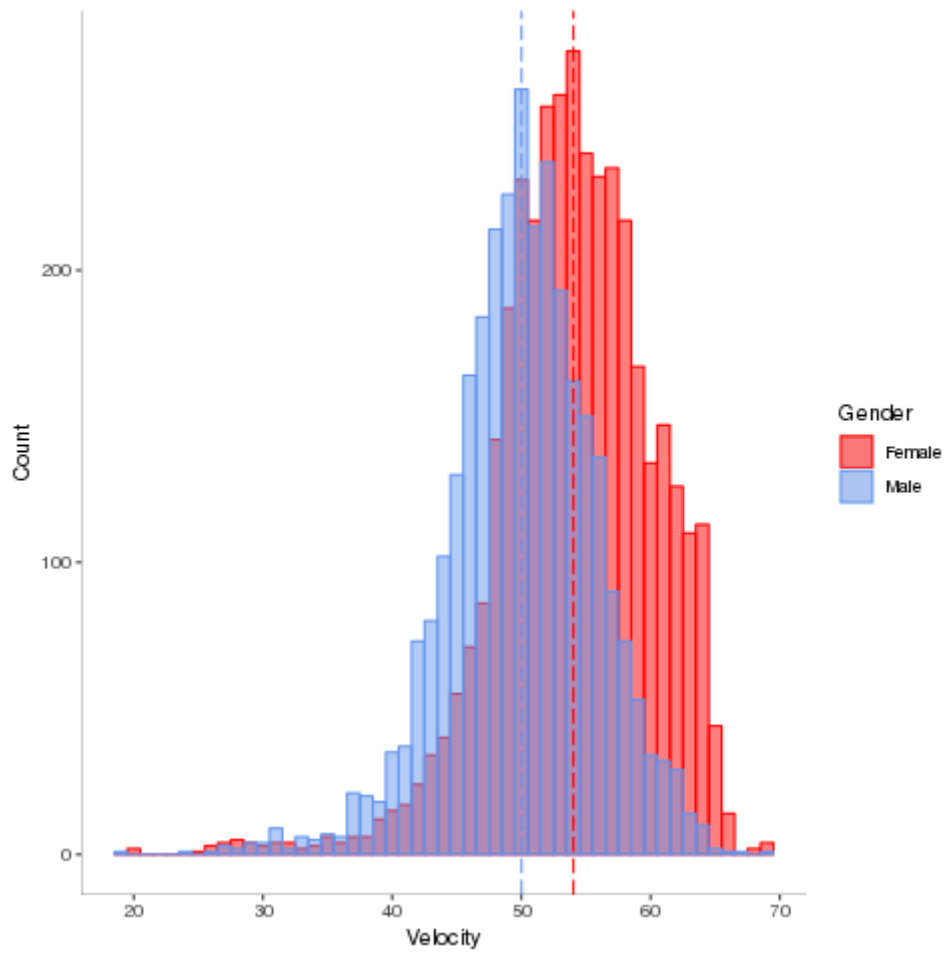

**1c. Sural Nerve Conduction Velocity (SNCV) for 6,989 individuals with SNCV ( $\text{m sec}^{-1}$ ) measurements.** Vertical dotted lines represent mean for each gender. Values at 40 m/sec and above are considered normal<sup>1,2</sup>.

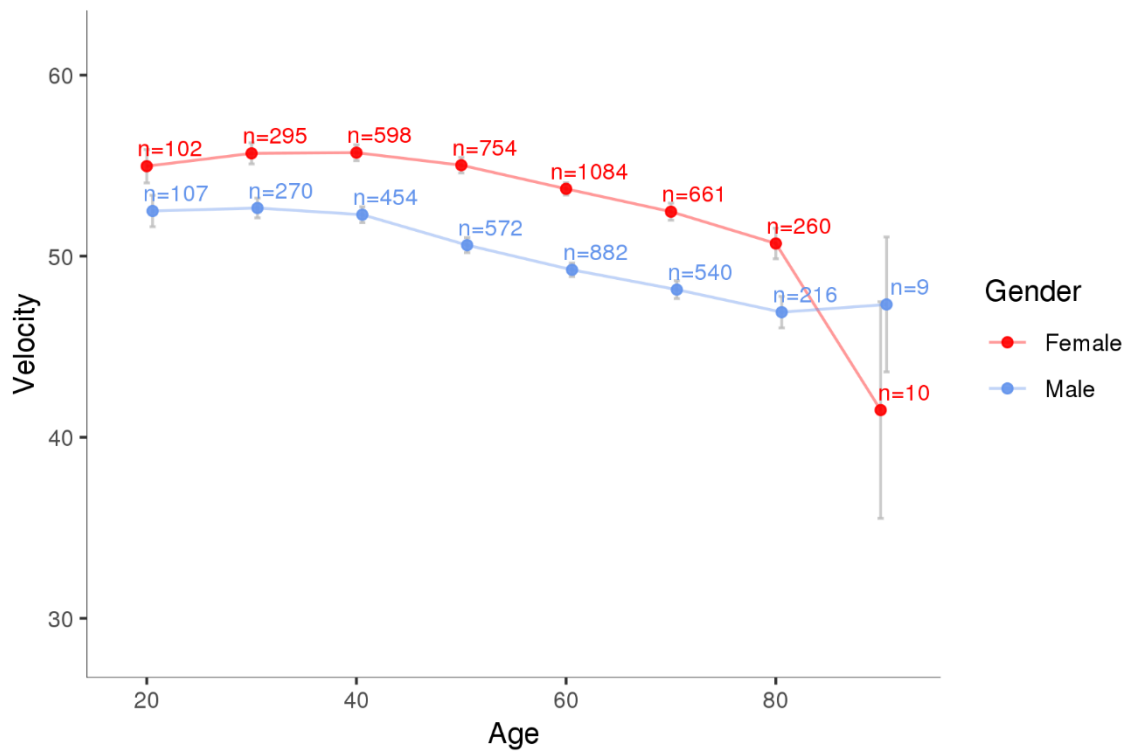

**1d. Mean SNCV (velocity) measurement per age group.**

Grey vertical lines represent 95% confidence intervals. Correlation between age and SNCV (m sec<sup>-1</sup>) is -0.25 ( $P = 1.4 \times 10^{-100}$ ).

Supplementary Figure 2. Manhattan plots for sural nerve conduction traits

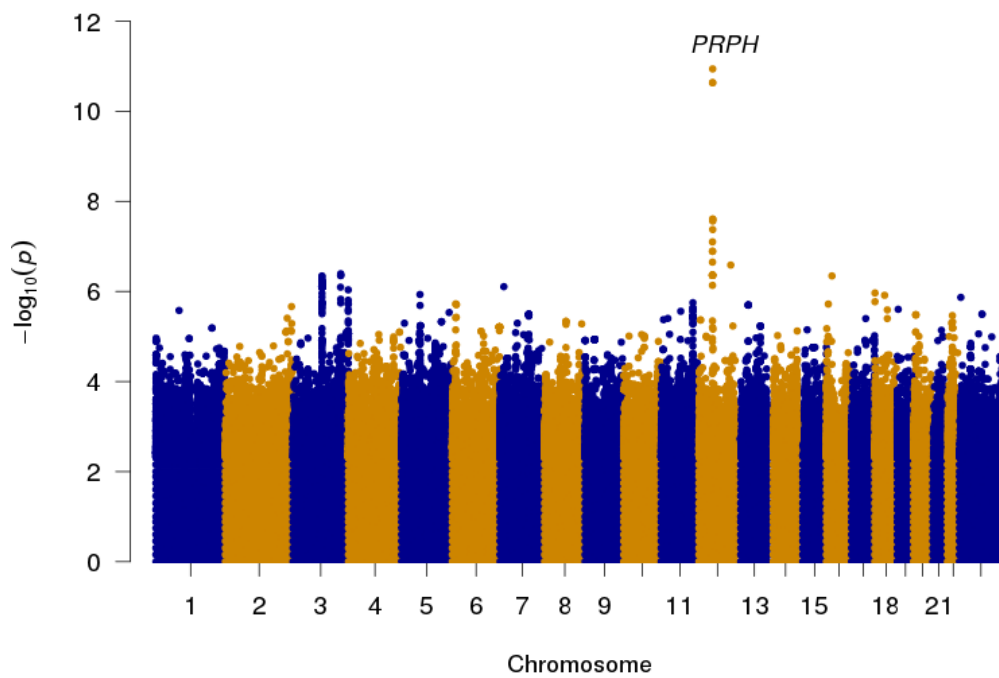

2a. Manhattan plot for GWAS of sural nerve amplitude potential (SNAP)

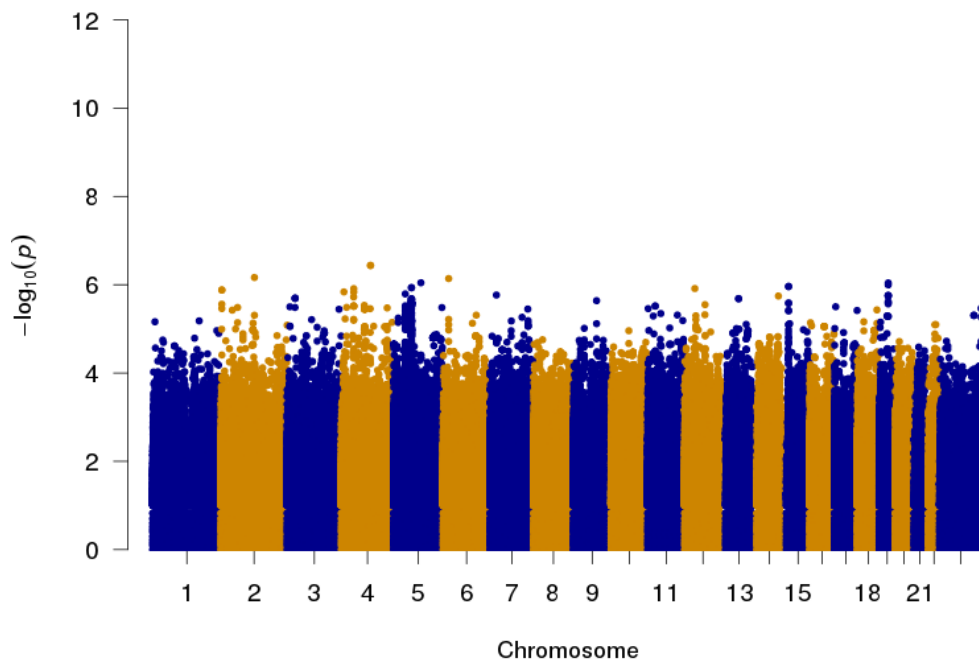

2b. Manhattan plot for GWAS of sural nerve conduction velocity (SNCV)

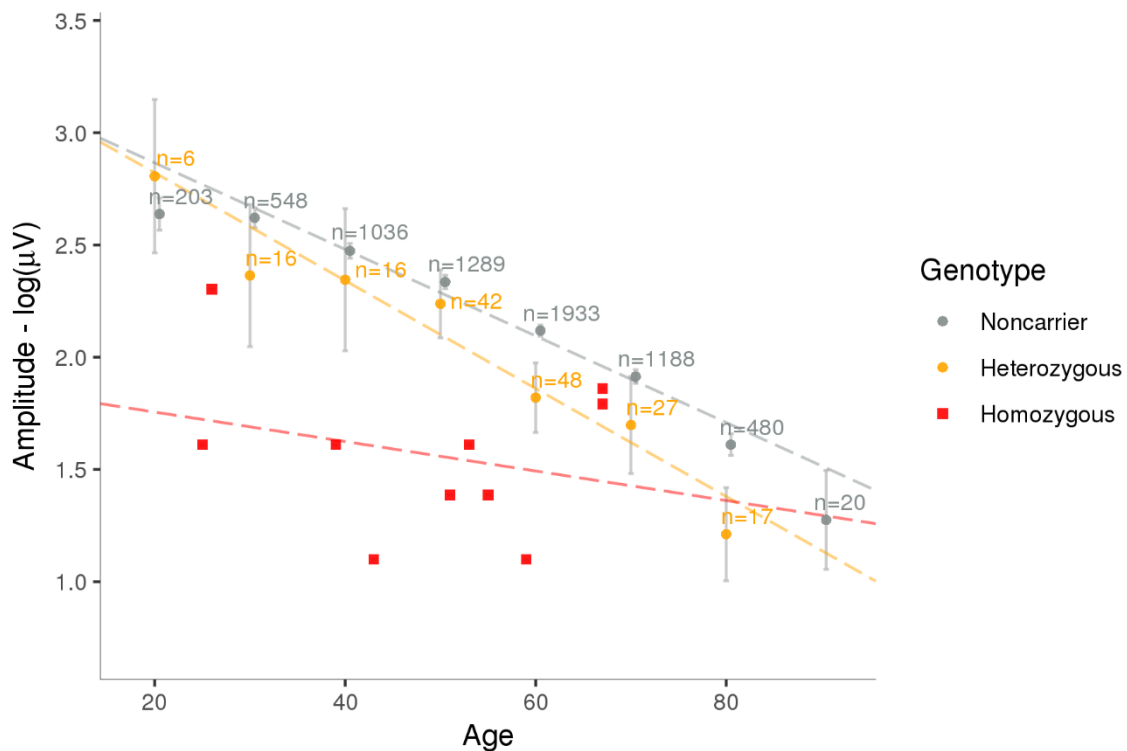

Supplementary Figure 3. Log(SNAP) (log(uV)), decreases with age (N=6,879)

Shown is the mean log(SNAP) per age group among non-carriers (grey dots) and heterozygotes (orange dots). Grey vertical lines represent 95% confidence intervals for the means. The red squares show individual values for the 10 homozygotes. The dotted lines represent results from a linear regression;  $\log(\text{SNAP} (\log(\text{Amplitude } \mu\text{V})) = \beta_0 + \beta_1 \cdot \text{Age}$ , for each genotype group. Non-carriers:  $N = 6,697$ ;  $\log(\text{SNAP}) = 3.25 - 0.02 \cdot \text{Age}$ ;  $R^2=0.21$ ;  $P = 3.1 \times 10^{-320}$ . Heterozygotes:  $N = 172$ ;  $\log(\text{SNAP}) = 3.30 - 0.02 \cdot \text{Age}$ ;  $R^2=0.30$ ;  $P = 6.8 \times 10^{-15}$ . Homozygotes:  $N = 10$ ;  $\log(\text{SNAP}) = 1.89 - 0.007 \cdot \text{Age}$ ;  $R^2=0.08$ ;  $P = 0.44$ .

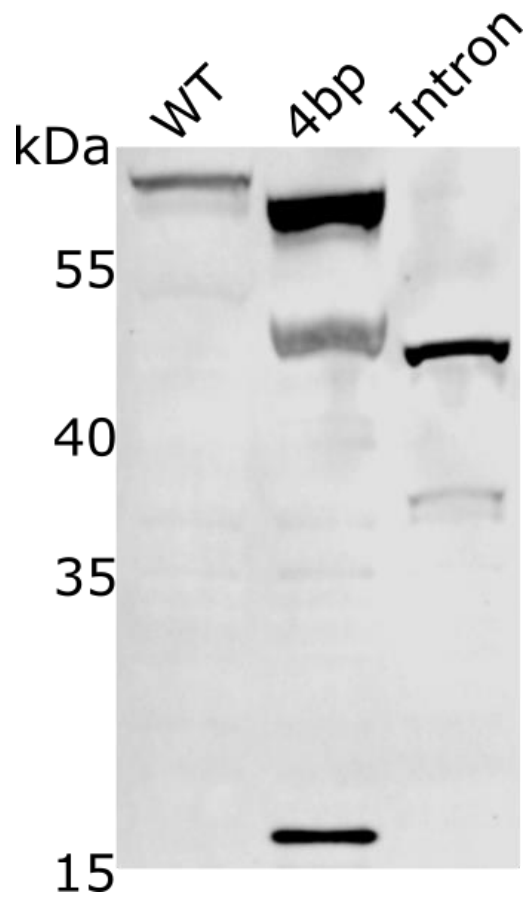

Supplementary Figure 4. Immunoblot analysis

SW-13 cells were transfected with WT *PRPH* (lane 1), 4bp *PRPH* (lane 2) or intron retention *PRPH* (lane 3). The panel shows detection with antibody recognizing the tag incorporated into the *PRPH* plasmid.



**Supplementary Table 1. Pearson correlations for nerve conduction and body measures**

Sural Nerve Amplitude Potential (SNAP,  $\mu\text{V}$ ),  $\log(\text{SNAP})$ ,  $\log(\mu\text{V})$ , Sural Nerve Conduction Velocity (SNCV, m/s), leg fat mass (LFM), Height (cm), BMI ( $\text{kg}/\text{m}^2$ ), Age (years), and blood measures: Glucose, Thyroid Stimulating Hormone (TSH) and vitamin B12.

**1a. Pearson correlations (r) for total sample**

| N                            |          | SNAP    | $\log(\text{SNAP})$ | SNCV     | LFM     | Height   | BMI     | Age      | Glucose | TSH     | B12     |
|------------------------------|----------|---------|---------------------|----------|---------|----------|---------|----------|---------|---------|---------|
| SNAP<br>6,826                | <i>r</i> | 1.00    | 0.93                | 0.22     | -0.24   | 0.00     | -0.17   | -0.43    | -0.11   | 0.00    | -0.05   |
|                              | <i>P</i> | 0.0E+00 | 0.0E+00             | 3.4E-74  | 6.3E-91 | 7.0E-01  | 3.7E-46 | 0.0E+00  | 3.1E-13 | 9.4E-01 | 1.5E-03 |
| $\log(\text{SNAP})$<br>6,826 | <i>r</i> | 0.93    | 1.00                | 0.27     | -0.25   | 0.00     | -0.19   | -0.46    | -0.12   | -0.01   | -0.05   |
|                              | <i>P</i> | 0.0E+00 | 0.0E+00             | 5.1E-113 | 2.9E-95 | 9.7E-01  | 1.2E-54 | 0.0E+00  | 3.6E-16 | 5.4E-01 | 2.2E-03 |
| SNCV<br>6,826                | <i>r</i> | 0.22    | 0.27                | 1.00     | 0.15    | -0.33    | 0.01    | -0.25    | -0.14   | -0.05   | 0.02    |
|                              | <i>P</i> | 3.4E-74 | 5.1E-113            | 0.0E+00  | 1.1E-36 | 1.4E-175 | 2.3E-01 | 1.4E-100 | 4.1E-20 | 2.2E-03 | 3.2E-01 |
| LFM<br>6,826                 | <i>r</i> | -0.24   | -0.25               | 0.15     | 1.00    | -0.22    | 0.70    | 0.02     | 0.04    | -0.01   | 0.02    |
|                              | <i>P</i> | 6.3E-91 | 2.9E-95             | 1.1E-36  | 0.0E+00 | 2.8E-72  | 0.0E+00 | 8.7E-02  | 1.4E-02 | 7.3E-01 | 1.8E-01 |
| Height<br>6,826              | <i>r</i> | 0.00    | 0.00                | -0.33    | -0.22   | 1.00     | -0.04   | -0.18    | 0.07    | 0.06    | -0.14   |
|                              | <i>P</i> | 7.0E-01 | 9.7E-01             | 1.4E-175 | 2.8E-72 | 0.0E+00  | 1.3E-03 | 3.8E-50  | 1.3E-06 | 1.2E-04 | 7.3E-23 |
| BMI<br>6,826                 | <i>r</i> | -0.17   | -0.19               | 0.01     | 0.70    | -0.04    | 1.00    | 0.08     | 0.26    | 0.02    | -0.04   |
|                              | <i>P</i> | 3.7E-46 | 1.2E-54             | 2.3E-01  | 0.0E+00 | 1.3E-03  | 0.0E+00 | 1.8E-10  | 5.6E-72 | 3.1E-01 | 1.6E-02 |
| Age<br>6,826                 | <i>r</i> | -0.43   | -0.46               | -0.25    | 0.02    | -0.18    | 0.08    | 1.00     | 0.15    | 0.04    | 0.11    |
|                              | <i>P</i> | 0.0E+00 | 0.0E+00             | 1.4E-100 | 8.7E-02 | 3.8E-50  | 1.8E-10 | 0.0E+00  | 2.3E-24 | 4.8E-03 | 9.3E-14 |
| Glucose<br>4,575             | <i>r</i> | -0.11   | -0.12               | -0.14    | 0.04    | 0.07     | 0.26    | 0.15     | 1.00    | 0.00    | 0.00    |
|                              | <i>P</i> | 3.1E-13 | 3.6E-16             | 4.1E-20  | 1.4E-02 | 1.3E-06  | 5.6E-72 | 2.3E-24  | 0.0E+00 | 1.0E+00 | 7.5E-01 |
| TSH<br>4,575                 | <i>r</i> | 0.00    | -0.01               | -0.05    | -0.01   | 0.06     | 0.02    | 0.04     | 0.00    | 1.00    | -0.01   |
|                              | <i>P</i> | 9.4E-01 | 5.4E-01             | 2.2E-03  | 7.3E-01 | 1.2E-04  | 3.1E-01 | 4.8E-03  | 1.0E+00 | 0.0E+00 | 6.5E-01 |
| B12<br>4,575                 | <i>r</i> | -0.05   | -0.05               | 0.02     | 0.02    | -0.14    | -0.04   | 0.11     | 0.00    | -0.01   | 1.00    |
|                              | <i>P</i> | 1.5E-03 | 2.2E-03             | 3.2E-01  | 1.8E-01 | 7.3E-23  | 1.6E-02 | 9.3E-14  | 7.5E-01 | 6.5E-01 | 0.0E+00 |

**1b. Pearson correlations (r) for males**

| N                            |          | SNAP     | $\log(\text{SNAP})$ | SNCV    | LFM     | Height  | BMI     | Age      | Glucose | TSH     | B12     |
|------------------------------|----------|----------|---------------------|---------|---------|---------|---------|----------|---------|---------|---------|
| SNAP<br>3,057                | <i>r</i> | 1.00     | 0.93                | 0.32    | -0.21   | -0.08   | -0.19   | -0.52    | -0.15   | 0.01    | -0.01   |
|                              | <i>P</i> | 0.0E+00  | 0.0E+00             | 5.0E-75 | 4.6E-33 | 8.2E-06 | 1.5E-27 | 1.1E-209 | 2.6E-12 | 5.7E-01 | 6.0E-01 |
| $\log(\text{SNAP})$<br>3,057 | <i>r</i> | 0.93     | 1.00                | 0.37    | -0.22   | -0.06   | -0.20   | -0.53    | -0.17   | 0.01    | -0.01   |
|                              | <i>P</i> | 0.0E+00  | 0.0E+00             | 4.3E-97 | 1.0E-33 | 1.8E-03 | 1.6E-28 | 1.7E-225 | 1.8E-14 | 7.2E-01 | 5.9E-01 |
| SNCV<br>3,057                | <i>r</i> | 0.32     | 3.7E-01             | 1.00    | 0.05    | -0.16   | 0.06    | -0.31    | -0.13   | -0.03   | -0.01   |
|                              | <i>P</i> | 5.0E-75  | 0.00                | 0.0E+00 | 4.5E-03 | 5.5E-20 | 1.5E-03 | 3.8E-70  | 4.0E-09 | 1.9E-01 | 5.7E-01 |
| LFM<br>3,057                 | <i>r</i> | -0.21    | -2.2E-01            | 0.05    | 1.00    | 0.17    | 0.79    | 0.01     | 0.12    | 0.00    | -0.07   |
|                              | <i>P</i> | 4.6E-33  | 0.00                | 4.5E-03 | 0.0E+00 | 3.5E-22 | 0.0E+00 | 4.3E-01  | 1.9E-08 | 8.9E-01 | 1.9E-03 |
| Height<br>3,057              | <i>r</i> | -0.08    | -5.7E-02            | -0.16   | 0.17    | 1.00    | -0.08   | -0.24    | -0.05   | 0.03    | -0.05   |
|                              | <i>P</i> | 8.2E-06  | 0.00                | 5.5E-20 | 3.5E-22 | 0.0E+00 | 1.3E-05 | 3.6E-41  | 3.0E-02 | 1.8E-01 | 4.0E-02 |
| BMI<br>3,057                 | <i>r</i> | -0.19    | -2.0E-01            | 0.06    | 0.79    | -0.08   | 1.00    | 0.08     | 0.27    | -0.01   | -0.05   |
|                              | <i>P</i> | 1.5E-27  | 0.00                | 1.5E-03 | 0.0E+00 | 1.3E-05 | 0.0E+00 | 5.4E-06  | 6.0E-36 | 6.0E-01 | 2.1E-02 |
| Age<br>3,057                 | <i>r</i> | -0.52    | -5.3E-01            | -0.31   | 0.01    | -0.24   | 0.08    | 1.00     | 0.18    | 0.02    | 0.04    |
|                              | <i>P</i> | 1.1E-209 | 0.00                | 3.8E-70 | 4.3E-01 | 3.6E-41 | 5.4E-06 | 0.0E+00  | 2.5E-16 | 2.9E-01 | 5.7E-02 |
| Glucose<br>2,046             | <i>r</i> | -0.15    | -1.7E-01            | -0.13   | 0.12    | -0.05   | 0.27    | 0.18     | 1.00    | -0.01   | -0.01   |
|                              | <i>P</i> | 2.6E-12  | 0.00                | 4.0E-09 | 1.9E-08 | 3.0E-02 | 6.0E-36 | 2.5E-16  | 0.0E+00 | 7.8E-01 | 7.3E-01 |
| TSH<br>2,046                 | <i>r</i> | 0.01     | 7.9E-03             | -0.03   | 0.00    | 0.03    | -0.01   | 0.02     | -0.01   | 1.00    | 0.03    |
|                              | <i>P</i> | 5.7E-01  | 0.72                | 1.9E-01 | 8.9E-01 | 1.8E-01 | 6.0E-01 | 2.9E-01  | 7.8E-01 | 0.0E+00 | 2.6E-01 |
| B12<br>2,046                 | <i>r</i> | -0.01    | -1.2E-02            | -0.01   | -0.07   | -0.05   | -0.05   | 0.04     | -0.01   | 0.03    | 1.00    |
|                              | <i>P</i> | 6.0E-01  | 0.59                | 5.7E-01 | 1.9E-03 | 4.0E-02 | 2.1E-02 | 5.7E-02  | 7.3E-01 | 2.6E-01 | 0.0E+00 |

**1c. Pearson correlations (r) for females**

| N         |          | SNAP     | log(SNAP) | SNCV    | LFM     | Height  | BMI     | Age      | Glucose | TSH     | B12     |
|-----------|----------|----------|-----------|---------|---------|---------|---------|----------|---------|---------|---------|
| SNAP      | <i>r</i> | 1.00     | 0.93      | 0.20    | -0.26   | -0.07   | -0.16   | -0.35    | -0.08   | -0.05   | -0.06   |
| 3,769     | <i>P</i> | 0.0E+00  | 0.0E+00   | 5.0E-75 | 4.6E-33 | 8.2E-06 | 1.5E-27 | 1.1E-209 | 7.6E-05 | 1.5E-02 | 5.2E-03 |
| log(SNAP) | <i>r</i> | 0.93     | 1.00      | 0.25    | -0.28   | -0.06   | -0.19   | -0.39    | -0.09   | -0.06   | -0.06   |
| 3,769     | <i>P</i> | 0.0E+00  | 0.0E+00   | 8.8E-55 | 4.4E-68 | 5.0E-04 | 1.1E-30 | 9.1E-134 | 2.0E-05 | 4.6E-03 | 4.3E-03 |
| SNCV      | <i>r</i> | 0.20     | 0.25      | 1.00    | 0.00    | -0.14   | 0.01    | -0.24    | -0.06   | -0.03   | -0.04   |
| 3,769     | <i>P</i> | 5.0E-75  | 8.8E-55   | 0.0E+00 | 4.5E-03 | 5.5E-20 | 1.5E-03 | 3.8E-70  | 1.8E-03 | 1.6E-01 | 2.8E-02 |
| LFM       | <i>r</i> | -0.26    | -0.28     | 0.00    | 1.00    | 0.17    | 0.80    | 0.02     | 0.11    | 0.07    | -0.04   |
| 3,769     | <i>P</i> | 4.6E-33  | 4.4E-68   | 4.5E-03 | 0.0E+00 | 3.5E-22 | 0.0E+00 | 4.3E-01  | 1.4E-08 | 1.0E-03 | 5.9E-02 |
| Height    | <i>r</i> | -0.07    | -0.06     | -0.14   | 0.17    | 1.00    | -0.12   | -0.26    | -0.06   | -0.02   | -0.08   |
| 3,769     | <i>P</i> | 8.2E-06  | 5.0E-04   | 5.5E-20 | 3.5E-22 | 0.0E+00 | 1.3E-05 | 3.6E-41  | 1.8E-03 | 4.6E-01 | 1.7E-04 |
| BMI       | <i>r</i> | -0.16    | -0.19     | 0.01    | 0.80    | -0.12   | 1.00    | 0.08     | 0.26    | 0.06    | -0.02   |
| 3,769     | <i>P</i> | 1.5E-27  | 1.1E-30   | 1.5E-03 | 0.0E+00 | 1.3E-05 | 0.0E+00 | 5.4E-06  | 4.0E-41 | 5.8E-03 | 2.5E-01 |
| Age       | <i>r</i> | -0.35    | -0.39     | -0.24   | 0.02    | -0.26   | 0.08    | 1.00     | 0.13    | 0.09    | 0.15    |
| 3,769     | <i>P</i> | 1.1E-209 | 9.1E-134  | 3.8E-70 | 4.3E-01 | 3.6E-41 | 5.4E-06 | 0.0E+00  | 9.1E-11 | 4.8E-06 | 3.6E-14 |
| Glucose   | <i>r</i> | -0.08    | -0.09     | -0.06   | 0.11    | -0.06   | 0.26    | 0.13     | 1.00    | -0.02   | 0.04    |
| 2,529     | <i>P</i> | 7.6E-05  | 2.0E-05   | 1.8E-03 | 1.4E-08 | 1.8E-03 | 4.0E-41 | 9.1E-11  | 0.0E+00 | 3.5E-01 | 8.2E-02 |
| TSH       | <i>r</i> | -0.05    | -0.06     | -0.03   | 0.07    | -0.02   | 0.06    | 0.09     | -0.02   | 1.00    | -0.03   |
| 2,529     | <i>P</i> | 1.5E-02  | 4.6E-03   | 1.6E-01 | 1.0E-03 | 4.6E-01 | 5.8E-03 | 4.8E-06  | 3.5E-01 | 0.0E+00 | 1.8E-01 |
| B12       | <i>r</i> | -0.06    | -0.06     | -0.04   | -0.04   | -0.08   | -0.02   | 0.15     | 0.04    | -0.03   | 1.00    |
| 2,529     | <i>P</i> | 5.2E-03  | 4.3E-03   | 2.8E-02 | 5.9E-02 | 1.7E-04 | 2.5E-01 | 3.6E-14  | 8.2E-02 | 1.8E-01 | 0.0E+00 |

Supplementary Table 2. Multiple regression analysis of log transferred SNAP ( $\log(\mu\text{V})$ ) and SNCV (m/s) in a model with covariates sex (male=1, female=2), age (years), height (cm), BMI ( $\text{kg}/\text{m}^2$ ) and leg fat mass (kg).

|                            | Sex    |         | Age    |          | Height (cm) |         | BMI ( $\text{kg}/\text{m}^2$ ) |         | LegFatMass (kg) |         | r <sup>2</sup> |
|----------------------------|--------|---------|--------|----------|-------------|---------|--------------------------------|---------|-----------------|---------|----------------|
| SNAP - $\log(\mu\text{V})$ | -0.098 | 1.4E-04 | -0.020 | 0.0E+00  | -0.013      | 4.0E-32 | 0.003                          | 1.7E-01 | -0.082          | 3.5E-37 | 0.29           |
| SNCV - (m/s)               | 0.071  | 8.0E-01 | -0.134 | 3.0E-169 | -0.245      | 1.2E-87 | -0.073                         | 1.7E-03 | 0.385           | 1.9E-08 | 0.22           |

Supplementary Table 3. Association results for rs73112142-A with common neuropathies in addition to neuropathy-related diagnoses and traits\*.

|                     | Phenotype (ICD-10 code)                                                                   | Ncase   | Ncontrol | Additive model |         | Recessive model |         |
|---------------------|-------------------------------------------------------------------------------------------|---------|----------|----------------|---------|-----------------|---------|
|                     |                                                                                           |         |          | Effect (OR)    | P value | Effect (OR)     | P value |
| Categorical traits  | Diabetic neuropathy (G59.0)                                                               | 243     | 223,621  | 0.563          | 0.26    | 0.018           | 0.87    |
|                     | Hereditary and Idiopathic neuropathy (G60)                                                | 222     | 341,775  | 0.52           | 0.29    | 0.018           | 0.74    |
|                     | Inflammatory polyneuropathy (G61)                                                         | 197     | 337,763  | 0.614          | 0.43    | 18.84           | 0.21    |
|                     | Other polyneuropathies (G62)                                                              | 501     | 317,307  | 1.484          | 0.14    | 5.375           | 0.55    |
|                     | Carpal tunnel syndrome (G56.0)                                                            | 811     | 306,927  | 0.975          | 0.92    | 1.846           | 0.87    |
|                     | Hypertension (I10)                                                                        | 55,194  | 338,458  | 1.051          | 0.29    | 0.631           | 0.37    |
|                     | Orthostatic hypotension (I95.1)                                                           | 2,859   | 331,424  | 1.252          | 0.06    | 0.017           | 0.18    |
|                     | Type2 Diabetes (E11)                                                                      | 14,321  | 277,786  | 0.993          | 0.93    | 0.796           | 0.83    |
|                     | Alcohol dependence (F10)                                                                  | 19,163  | 293,157  | 1.048          | 0.52    | 2.644           | 0.10    |
|                     | Phenotype (QT*)                                                                           | Ncase   | Ncontrol | Effect (SD)    | P value | Effect (SD)     | P value |
| Quantitative traits | Systolic blood pressure                                                                   | 120,837 | -        | -0.001         | 0.97    | -0.206          | 0.47    |
|                     | Diastolic blood pressure                                                                  | 120,828 | -        | 0.007          | 0.75    | -0.005          | 0.99    |
|                     | B12                                                                                       | 157,081 | -        | 0.026          | 0.09    | 0.115           | 0.58    |
|                     | Glucose (fasting)                                                                         | 126,665 | -        | 0.006          | 0.76    | 0.635           | 0.03    |
|                     | IgA                                                                                       | 29,805  | -        | 0.047          | 0.12    | 0.469           | 0.23    |
|                     | IgG                                                                                       | 27,078  | -        | 0.056          | 0.08    | 0.476           | 0.28    |
|                     | IgM                                                                                       | 24,719  | -        | 0.025          | 0.49    | 0.603           | 0.18    |
|                     | Thyroid Stimulating Hormone (TSH)                                                         | 207,748 | -        | 0.005          | 0.73    | 0.016           | 0.91    |
|                     | DN4, neuropathic pain score                                                               | 4,576   | -        | 0.021          | 0.81    | -0.089          | 0.83    |
| *                   | All quantitative traits were adjusted for gender and age and normalized for GWAS analysis |         |          |                |         |                 |         |

Supplementary Table 4. GWAS catalogue associations with PN tested in SNAP and SNCV

A) Associations ( $P < 1 \times 10^{-8}$ ) with peripheral neuropathy (PN) as reported in the GWAS-catalogue (<https://www.ebi.ac.uk/gwas/>, access date October 17<sup>th</sup>, 2018).

| Variant and risk allele | marker (hg38)  | P                  | OR   | CI          | Mapped gene                                  | Reported trait                                                                                                |
|-------------------------|----------------|--------------------|------|-------------|----------------------------------------------|---------------------------------------------------------------------------------------------------------------|
| rs12722486-?            | chr10:6061799  | $2 \times 10^{-9}$ | 38.2 | NR          | <i>IL2RA</i>                                 | Response to anti-retroviral therapy (ddi/d4T) in HIV-1 infection (Grade 3 peripheral neuropathy) <sup>3</sup> |
| rs266095-?              | chr10:44368720 | $8 \times 10^{-9}$ | 56.3 | NR          | <i>CXCL12</i>                                | Response to anti-retroviral therapy (ddi/d4T) in HIV-1 infection (Grade 3 peripheral neuropathy) <sup>3</sup> |
| rs924607-T              | chr5:609978    | $6 \times 10^{-9}$ | 2.43 | (1.70-3.49) | <i>LOC100996325</i> ,<br><i>LOC105374608</i> | Vincristine-induced peripheral neuropathy in acute lymphoblastic leukemia <sup>4</sup>                        |

?=risk allele not reported (NR); Odds Ratio (OR); 95% Confidence Interval (CI).

B) Association with Sural Nerve Amplitude Potential (SNAP) in Icelandic data (N=6,879)

| SNP            | Position (hg38) | P     | P*       | Gene          | β (SD) | iceMAF | eurMAF | Info     |
|----------------|-----------------|-------|----------|---------------|--------|--------|--------|----------|
| rs12722486 - T | chr10:6061799   | 0.727 | 7.50E-10 | <i>IL2RA</i>  | -0.020 | 2.5    | 4.7    | 0.999861 |
| rs266095 - T   | chr10:44368720  | 0.182 | 4.50E-09 | <i>CXCL12</i> | 0.065  | 3.6    | 6.5    | 0.999089 |
| rs924607 - T   | chr5:609978     | 0.551 | 4.50E-09 | <i>CEP72</i>  | 0.011  | 37.3   | 41.0   | 0.999821 |

P\* refers to the set P-value threshold set by weighting sequence variants based on their annotation<sup>5</sup>

C) Association with Sural Nerve Conduction Velocity (SNCV) in Icelandic data (N=6,979)

| SNP            | Position (hg38) | P     | P*       | Gene          | β (SD) | iceMAF | eurMAF | Info     |
|----------------|-----------------|-------|----------|---------------|--------|--------|--------|----------|
| rs12722486 - T | chr10:6061799   | 0.280 | 7.50E-10 | <i>IL2RA</i>  | 0.062  | 2.5    | 4.7    | 0.999861 |
| rs266095 - T   | chr10:44368720  | 0.304 | 4.50E-09 | <i>CXCL12</i> | 0.049  | 3.6    | 6.5    | 0.999089 |
| rs924607 - T   | chr5:609978     | 0.302 | 4.50E-09 | <i>CEP72</i>  | -0.019 | 37.3   | 41.0   | 0.999821 |

P\* refers to the set P-value threshold set by weighting sequence variants based on their annotation<sup>5</sup>

Supplementary Table 5. Summary of neurological exam results for re-called subjects

Results of sensory testing, standardized neuropathy assessment scales and related measures for the neurologically assessed re-called sample (N = 69) per genotype of rs73112142.

| rs73112142 genotype:                   | AA (N = 9) |               | AG (N = 34) |               | GG (N = 26) |               | $P_{ANOVA}$ ( $P_{t-test}$ )             |
|----------------------------------------|------------|---------------|-------------|---------------|-------------|---------------|------------------------------------------|
| Exam results                           | M          | (95% CI)      | M           | (95% CI)      | M           | (95% CI)      |                                          |
| Male/female ratio                      | 6/3        |               | 17/17       |               | 14/12       |               |                                          |
| Age at assessment                      | 52.4       | (40.8-64.1)   | 52.6        | (46.9- 58.2)  | 50.9        | (45.4-56.4)   | 0.91 (0.77)                              |
| BMI (kg/m <sup>2</sup> )               | 28.6       | (26.1-31.1)   | 29.1        | (27.1-31.1)   | 26.4        | (24.7-28.1)   | 0.11 (0.16)                              |
| <b>Blood levels</b>                    |            |               |             |               |             |               |                                          |
| B12 (pmol/L)*                          | 565.3      | (237.5-893.0) | 418.2       | (315.5-520.8) | 436.4       | (336.9-535.9) | 0.36 (0.28)                              |
| Glucose (mmol/L)*                      | 5.0        | (4.5-5.5)     | 5.7         | (5.0-6.4)     | 5.5         | (5.2-5.8)     | 0.29 (0.07)                              |
| TSH (mIU/L)*                           | 1.7        | (0.9-2.4)     | 1.7         | (1.3-2.0)     | 1.6         | (1.3-1.9)     | 0.95 (0.81)                              |
| <b>Nerve conduction</b>                |            |               |             |               |             |               |                                          |
| SNAP (μV)                              | 4.0        | (2.9-5.2)     | 6.3         | (5.0-7.6)     | 14.5        | (10.7-18.4)   | 4·10 <sup>-6</sup> (2·10 <sup>-3</sup> ) |
| SNCV (m/sec)                           | 50.9       | (46.7-55.1)   | 50.3        | (47.8-52.7)   | 51.6        | (49.3-54.0)   | 0.71 (0.74)                              |
| <b>Quantitative sensory tests</b>      |            |               |             |               |             |               |                                          |
| Cold DT (°C)                           | 25.7       | (22.5-28.8)   | 26.8        | (25.2-28.5)   | 28.1        | (26.2-30.0)   | 0.33 (0.16)                              |
| Warm DT (°C)                           | 42.2       | (38.8-45.7)   | 39.6        | (38.3-41.0)   | 39.1        | (37.6-40.6)   | 0.10 (0.04)                              |
| Cold pain (°C)                         | 8.4        | (1.4-15.3)    | 6.5         | (3.8-9.3)     | 5.1         | (1.7-8.4)     | 0.55 (0.31)                              |
| Heat pain (°C)                         | 47.0       | (44.6-49.4)   | 46.6        | (45.6-47.5)   | 46.3        | (44.6-48.0)   | 0.85 (0.62)                              |
| <b>Standardized neurological exams</b> |            |               |             |               |             |               |                                          |
| DNS Total (r0-4)                       | 1.3        | (0.0-2.7)     | 0.5         | (0.2-0.8)     | 0.4         | (0.2-0.7)     | 0.05 (0.03)                              |
| UENS Total (r0-42)                     | 5.0        | (2.2-7.8)     | 1.7         | (0.7-2.8)     | 1.5         | (0.5-2.3)     | 6·10 <sup>-3</sup> (2·10 <sup>-3</sup> ) |
| -Great toe extension (r0-4)            | 0.4        | (-0.1-1.0)    | 0.2         | (-0.1-0.5)    | 0.2         | (-0.1-0.5)    | 0.69 (0.41)                              |
| -Pin sensation (r0-24)                 | 1.6        | (-0.2-3.3)    | 0.2         | (-0.1-0.6)    | 0.3         | (-0.1-0.6)    | 0.02 (0.02)                              |
| -Great toe vibration time (sec)        | 10.6       | (4.3-16.9)    | 16.2        | (13.4-19.0)   | 19.5        | (16.7-22.3)   | 0.01 (4·10 <sup>-3</sup> )               |
| -Allodynia/Hyperesthesia (r0-2)        | 0.4        | (-0.1 -1.0)   | -0.3        | (0.0-0.6)     | 0.4         | (0.1-0.8)     | 0.79 (0.95)                              |
| -Large fiber sensation (r0-8)          | 2.1        | (0.3-3.9)     | 0.7         | (0.3-1.2)     | 0.5         | (-0.1-1.0)    | 0.02 (0.01)                              |
| -Deep tendon reflexes (r0-4)           | 0.4        | (-0.2-1.1)    | 0.2         | (-0.1-0.5)    | 0.1         | (-0.1-0.3)    | 0.46 (0.41)                              |
| TCNS Total (r0-19)                     | 5.0        | (1.8-8.2)     | 2.4         | (1.6-3.2)     | 1.8         | (1.0 -2.5)    | 7·10 <sup>-3</sup> (4·10 <sup>-3</sup> ) |
| -Symptom score (r0-6)                  | 1.8        | (0.1-3.4)     | 1.0         | (0.5-1.5)     | 0.7         | (0.3-1.1)     | 0.13 (0.04)                              |
| -Reflex score (r0-8)                   | 0.5        | (-0.1-1.1)    | 0.4         | (0.1-0.7)     | 0.2         | (0.0-0.3)     | 0.32 (0.12)                              |
| -Sensory tests (r0-5)                  | 2.4        | (0.6-4.3)     | 0.6         | (0.3-1.0)     | 0.8         | (0.4-1.1)     | 3·10 <sup>-3</sup> (2·10 <sup>-3</sup> ) |
| Grip strength (kg)                     | 45.9       | (37.1-54.7)   | 39.2        | (33.3-45.2)   | 41.0        | (34.6-47.3)   | 0.53 (0.39)                              |
| Romberg test (sec)                     | 54.4       | (41.6-67.3)   | 59.1        | (57.2-60.9)   | 59.2        | (57.6-60.9)   | 0.21 (0.18)                              |
| Single leg stance (sec)                | 30         | (30.0-30.0)   | 25.3        | (22.0-28.6)   | 28.1        | (25.6-30.6)   | 0.18 (0.45)                              |
| DN4 (r0-7)                             | 0.1        | (-0.2-0.4)    | 0.2         | (0.0-0.4)     | 0.2         | (0.0-0.4)     | 0.93 (0.69)                              |
| <b>Peripheral neuropathy</b>           |            |               |             |               |             |               |                                          |
| UENS diagnosed/assessed (%)            | 5/9        | (56%)         | 5/34        | (15%)         | 2/26        | (8%)          | $P_{chi} = 4·10^{-3}$                    |
| Male/female ratio                      | 2/3        |               | 2/3         |               | 0/2         |               |                                          |
| Age at onset (r)                       | 20.0       | (10-35)       | 56.6        | (45-70)       | 58.5        | (52-65)       | 1·10 <sup>-3</sup> (6·10 <sup>-3</sup> ) |

BMI: Body Mass Index, B12 (normal 210-800 pmol/L), Glucose (normal 4-6 mmol/L), Thyroid Stimulating Hormone (TSH) (normal 0.27- 4.20 mIU/L). SNAP: Sural nerve amplitude potential (normal >4), SNCV: Sural nerve conduction velocity (normal >40), DT: detection threshold (°C, thermal tests performed on sural nerve dermatome), DNS: Diabetic neuropathy score<sup>6</sup>, UENS: Utah Early Neuropathy Scale<sup>7</sup>, TCNS: Toronto Clinical Neuropathy Score<sup>8</sup>, Single leg stance (30 sec max), DN4: Dolor Neuropathique 4 neuropathic pain score<sup>9</sup>, r: score range. \*Blood levels missing for 1 homozygote, 12 heterozygotes and 9 non-carriers.  $P_{ANOVA}$  between three genotype groups /  $P_{t-test}$ , two-sided, between AA and GG only,  $P_{chi}$ , Chi-squared test.

Supplementary Table 6. Primers used for *PRPH* plasmids generation

| <b>Primer name</b>   | <b>Sequence</b>                                               |
|----------------------|---------------------------------------------------------------|
| PRPH_4bp_F           | ATGAAACGAGGCGCTGCTCAGGCAG                                     |
| PRPH_4bp_R           | CGTGCCGCGCAGCCCGTC                                            |
| PRPH_delStop2myc_F   | ACGCGTACGCGGCCGCTC                                            |
| PRPH_4bp_delStop_R   | GGCACAGTCGTCTTTATATTTAAGGAGGCAAAAGAATGG                       |
| PRPH_intr5_F         | GAAATGTTCTGCAACTGGCCCCTTCCACTCTCCTACCCAGAACGAGGCGCTGCTCAGGCAG |
| PRPH_intr5_R         | ATCGTCCGCTCCCCGGGCCCGAGCGCGCAGCTTCGTACTCATCGTGCCGCGCAGCCCGTC  |
| PRPH_delStop2myc_F   | ACGCGTACGCGGCCGCTC                                            |
| PRPH_intr5_delStop_R | ACTGCCTGAGCAGCGCCTC                                           |

## Supplementary References

1. Chen, S. *et al.* Electrodiagnostic reference values for upper and lower limb nerve conduction studies in adult populations. *Muscle Nerve* **54**, 371-7 (2016).
2. Neurometrix Inc. NC-stat® DPNCheck™ Normative Data: Collection, Analysis and Recommended Normal Limits. (Waltham, MA, 2013).
3. Leger, P.D. *et al.* Genome-wide association study of peripheral neuropathy with D-drug-containing regimens in AIDS Clinical Trials Group protocol 384. *J Neurovirol* **20**, 304-8 (2014).
4. Diouf, B. *et al.* Association of an inherited genetic variant with vincristine-related peripheral neuropathy in children with acute lymphoblastic leukemia. *JAMA* **313**, 815-23 (2015).
5. Sveinbjornsson, G. *et al.* Weighting sequence variants based on their annotation increases power of whole-genome association studies. *Nat Genet* **48**, 314-7 (2016).
6. Meijer, J.W. *et al.* Symptom scoring systems to diagnose distal polyneuropathy in diabetes: the Diabetic Neuropathy Symptom score. *Diabet Med* **19**, 962-5 (2002).
7. Singleton, J.R. *et al.* The Utah Early Neuropathy Scale: a sensitive clinical scale for early sensory predominant neuropathy. *J Peripher Nerv Syst* **13**, 218-27 (2008).
8. Abraham, A. *et al.* Toronto Clinical Neuropathy Score is valid for a wide spectrum of polyneuropathies. *Eur J Neurol* **25**, 484-490 (2018).
9. Bouhassira, D. *et al.* Comparison of pain syndromes associated with nervous or somatic lesions and development of a new neuropathic pain diagnostic questionnaire (DN4). *Pain* **114**, 29-36 (2005).
